# Supplementary material
Source: HighWire-hosted journal article supplement (http://www.cmaj.ca/highwire/filestream/58550/field_highwire_adjunct_files/1/child-temcheff-2-at.pdf)
Supplement: child-temcheff-2-at.pdf [file child-temcheff-2-at.pdf]

## **Appendix 2 (as supplied by authors): Medical codes included in outcome measures**

- (1) Total number of medical visits: All codes minus any intervention or diagnosis indicating gynecological visit, pregnancy, abortion, or delivery.
- (2) Medical visits for injuries: ICD-9 codes between 800.0 to 999.9
- (3) Medical visits for lifestyle-related illness: Obesity codes 2780-2789; Diabetes codes 2500-2509; Ulcers codes 5310-5339; Alcohol dependence codes 3030-3039 and/or 9800-9800; Drug dependence codes 3040-3049.
- (4) Visits to medical specialists: Within the RAMQ codes, there is a specific field that indicates visit to a specialist. Any "non-blank" or "non-zero" codes (a blank would suggest a general practitioner physician) used in this field was included.
- (5) ER visits: Variable created by a count of the "ER" code within the "milieu" field.
- (6) Medicare dental visits: V codes 72.2, 53.4 and 52.3 PLUS ICD-9 codes 520 to 528, excluding 527.
- (7) Medical visits for infections: ICD-9 codes 0 to 139; 460-519 (excluding asthma); 380-382.
- (8) Gynecological and obstetric visits (calculated for women only): 6100 – 6769.
- (9) Hospitalizations: Information provided by the MSSS. No codes, just number counts of instances per person.
